# Supplementary material for: In Vitro and In Silico Evaluation of Bikaverin as a Potent Inhibitor of Human Protein Kinase CK2
Source: PubMed Central journal article supplement (PMC6479664; doi:10.3390/molecules24071380), 2019-04-08
Supplement: molecules-24-01380-s001.pdf [file molecules-24-01380-s001.pdf]

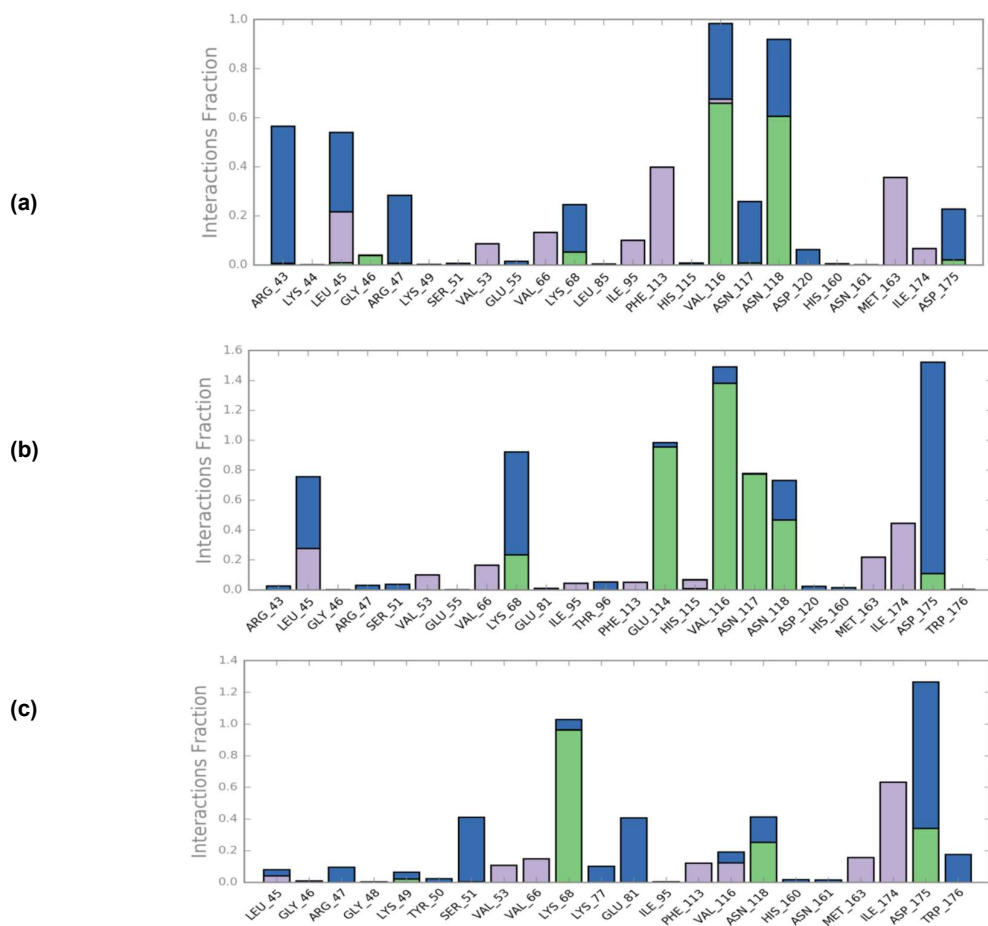

**Figure S1.** Protein interactions with (a) bikaverin, (b) ellagic acid, and (c) emodin. The green parts represent the hydrogen bonds, the violet parts represent hydrophobic, and blue parts represent water bridges.
